# Supplementary material for: Evaluation of Immunogenicity and Efficacy of Fasciola hepatica Tetraspanin 2 (TSP2) Fused to E. coli Heat-Labile Enterotoxin B Subunit LTB Adjuvant Following Intranasal Vaccination of Cattle
Source: MDPI journal article supplement (doi:10.3390/vaccines9111213), 2021-10-20
Supplement: s1 [file s1]

**Data S1.** The nucleotides translating TSP2 amino acid sequence (accession number Fh47871).

>FhD47871

```
atggcttccttaagttgtggttacaaatgtctccaggtgatcctggtattatgaatatcattgtggctatttgggatagcactgatcgtcgttgatca
attgcagaagttaacttaagaaatatgggacttcggatgacgtctatcttagagcattcgtaattcctataatagctttgggtgcttcacgcgcttg
ggcataattggcttctgtggagctgtaaaaagagcgttattgtcttacctgtacattatcttcaatcctcatacttgctggttggctgccgtatt
gctggttctgtctgaaggacaaagtcaaaaggtacgtgacgaaaagcatgacagaagccttcaacaaatatcaagacctacataccaaaaagtt
atcgataccattcagaaagacctcaaatgctgtggcccaacgggacgtggacaggttcgggaagtccgccacctcatgctacggccctgatgga
cagctttactccgacggctgctgacaaaatgttcaacaattctcaagaaaaacgtagtgtgctggccgcatgtgtcttggatttgcaattatccaaa
tactcgaattgtatttgcgttgcgtttgtcaagcaatcaaaagaggtgaaacggcctaa
```

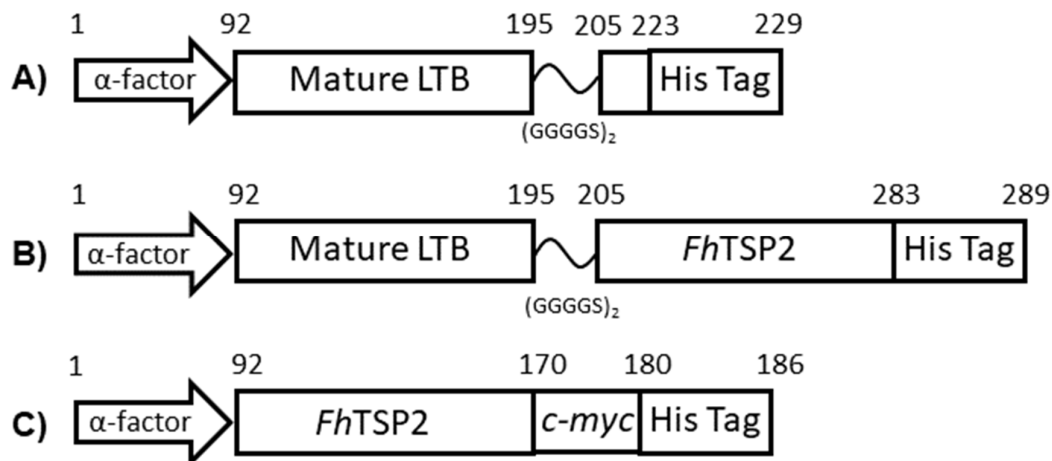

**Figure S1.** Graphical representation of recombinant protein constructs within secretory vector pPICZα. A) rLTB: plasmid α-factor secretory signal sequence upstream of the mature LTB sequence linked to a polyhistidine-tag via a flexible glycine rich linker (GGGGS)<sub>2</sub> and vector translated amino acids. B) rLTB-FhTSP2: plasmid α-factor secretory signal sequence upstream of the mature LTB sequence linked via (GGGGS)<sub>2</sub> to the extracellular loop 2 of the FhTSP2 sequence and a polyhistidine-tag. C) rFhTSP2: the plasmid α-factor secretory signal sequence upstream of the extracellular loop 2 of the FhTSP2 followed by the vectors c-myc epitope and polyhistidine-tag. Mature LTB, human variant (accession M178974) and recombinant FhTSP2 consists of the extracellular loop 2 from amino acid position 108 to 185 of FhD #47871.

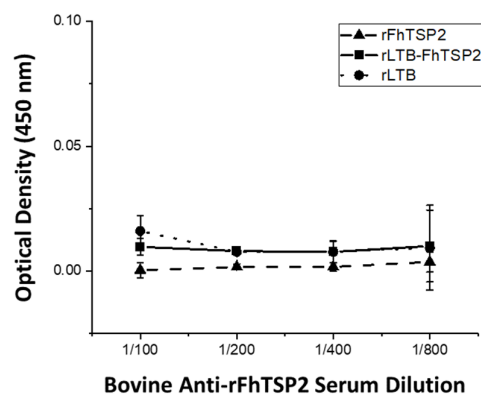

**Figure S2.** Naïve sera control for characterisation of antigenicity of rLTB-FhTSP2 fusion complex. Pooled ( $n=3$ ) sera from cattle prior to vaccination with rFhTSP2 were used to test the reactivity of rFhTSP2, rLTB-FhTSP2 and rLTB using diluted bovine sera (1:100, 1:200, 1:400 and 1:800).

**Table S1.** Spearman correlation values between fluke burdens and bovine humoral responses in groups vaccinated with rFhTSP2 and rLTB-FhTSP2. Significant values ( $p < 0.05$ ) are denoted with an asterisk (\*).

|                    | Serum IgG |           |           | Serum IgA |        |        | Saliva IgA |        |            |
|--------------------|-----------|-----------|-----------|-----------|--------|--------|------------|--------|------------|
|                    | D42       | D84       | D125      | D42       | D84    | D125   | D42        | D84    | D125       |
| rTSP2              | 0.06      | -0.41     | -0.26     | -0.43     | -0.46  | -0.37  | -0.06      | 0.09   | 0.09       |
| ( <i>p</i> -value) | (0.91)    | (0.42)    | (0.62)    | (0.40)    | (0.32) | (0.47) | (0.91)     | (0.87) | (0.87)     |
| rLTB-TSP2          | 0.83      | 0.94      | 0.94      | -0.09     | 0.49   | 0.31   | 0.77       | 0.54   | -1         |
| ( <i>p</i> -value) | (0.04) *  | (0.005) * | (0.005) * | (0.87)    | (0.32) | (0.54) | (0.07)     | (0.27) | (<0.001) * |
